# Supplementary material for: Newborn-Care Training and Perinatal Mortality in Developing Countries
Source: Atypon-hosted journal article supplement (doi:10.1056/nejmsa0806033), 2010-02-17
Supplement: nejm_carlo_614sa1.pdf [file nejm_carlo_614sa1.pdf]

## Supplementary Appendix

This appendix has been provided by the authors to give readers additional information about their work.

Supplement to: Carlo WA, Goudar SS, Jehan I, et al. Newborn-care training and perinatal mortality in developing countries. *N Engl J Med* 2010;362:614-23.

Appendix Table 1: 7-Day Neonatal Mortality Rates According to Characteristics of the Infant or Delivery\*

|                              | Pre-ENC<br>n (Rate/1000) | Post-ENC<br>n (Rate/1000) | RR (95% CI)<br>Post- vs. Pre-ENC | Post-NRP<br>Intervention<br>n (Rate/1000) | Post-NRP Control<br>n (Rate/1000) | RR (95% CI)<br>Post-NRP Intervention<br>vs. Control |
|------------------------------|--------------------------|---------------------------|----------------------------------|-------------------------------------------|-----------------------------------|-----------------------------------------------------|
| 7-day neonatal mortality     | 513 (23.4)               | 793 (23.2)                | 0.99 (0.81, 1.22)                | 543 (18.6)                                | 685 (21.4)                        | 0.87 (0.65, 1.16)                                   |
| Male                         | 287 (25.0)               | 469 (26.4)                | 1.05 (0.84, 1.32)                | 297 (20.2)                                | 401 (23.5)                        | 0.86 (0.64, 1.15)                                   |
| Female                       | 225 (21.5)               | 323 (19.8)                | 0.92 (0.74, 1.14)                | 246 (17.5)                                | 282 (18.8)                        | 0.93 (0.67, 1.29)                                   |
| Birth attendant              |                          |                           |                                  |                                           |                                   |                                                     |
| All birth attendants         | 391 (21.3)               | 531 (19.7)                | 0.93 (0.74, 1.16)                | 429 (19.0)                                | 547 (20.5)                        | 0.93 (0.67, 1.29)                                   |
| Physician                    | 75 (19.2)                | 81 (16.1)                 | 0.84 (0.52, 1.34)                | 24 (13.2)                                 | 83 (20.7)                         | 0.64 (0.35, 1.16)                                   |
| Nurse/midwife                | 176 (24.8)               | 158 (19.0)                | 0.77 (0.56, 1.04)                | 246 (24.2)                                | 177 (18.5)                        | 1.31 (0.85, 2.03)                                   |
| Traditional birth attendants | 140 (19.1)               | 292 (21.6)                | 1.13 (0.86, 1.49)                | 159 (15.0)                                | 287 (21.9)                        | 0.68 (0.45, 1.03)                                   |
| Family/unattended/other      | 122 (34.0)               | 261 (36.1)                | 1.06 (0.74, 1.52)                | 113 (17.2)                                | 138 (25.7)                        | 0.67 (0.45, 1.00)                                   |
| Location of birth            |                          |                           |                                  |                                           |                                   |                                                     |
| Home/birth attendant home    | 374 (25.8)               | 581 (25.8)                | 1.00 (0.82, 1.22)                | 402 (20.3)                                | 498 (23.0)                        | 0.88 (0.64, 1.21)                                   |
| Clinic                       | 39 (23.3)                | 100 (27.6)                | 1.18 (0.80, 1.75)                | 73 (14.1)                                 | 82 (15.1)                         | 0.94 (0.55, 1.61)                                   |
| Hospital                     | 100 (17.3)               | 111 (13.9)                | 0.80 (0.51, 1.27)                | 67 (15.9)                                 | 105 (21.1)                        | 0.76 (0.35, 1.01)                                   |

| Birth weight    |                                                                                                   |
|-----------------|---------------------------------------------------------------------------------------------------|
| 1500-1999 grams | 80 (198.0)    138 (194.1)    0.98 (0.67, 1.44)    103 (113.9)    115 (190.7)    0.60 (0.35, 1.01) |
| 2000-2499 grams | 128 (59.7)    191 (53.7)    0.90 (0.63, 1.28)    162 (43.4)    191 (47.4)    0.92 (0.65, 1.28)    |
| ≥ 2500 grams    | 194 (12.0)    366 (12.7)    1.06 (0.77, 1.45)    236 (9.9)    310 (11.4)    0.87 (0.60, 1.25)     |

ENC=Essential Newborn Care; NRP=Neonatal Resuscitation Program

\*May reflect missing value; birth weight available for 87.4% of infants with 7-day mortality

Appendix Table 2: Stillbirth Rates According to Characteristics of the Infant or Delivery\*

|                              | Pre-ENC<br>n (Rate/1000) | Post-ENC<br>n (Rate/1000) | RR (95% CI)<br>Post- vs. Pre-ENC | Post-NRP<br>Intervention<br>n (Rate/1000) | Post-NRP Control<br>n (Rate/1000) | RR (95% CI)<br>Post-NRP Intervention<br>vs. Control |
|------------------------------|--------------------------|---------------------------|----------------------------------|-------------------------------------------|-----------------------------------|-----------------------------------------------------|
| Stillbirth                   | 520 (23.0)               | 557 (15.9)                | 0.69 (0.54, 0.88)                | 468 (15.7)                                | 491 (15.0)                        | 1.05 (0.82, 1.33)                                   |
| Fresh stillbirth             | 440 (19.4)               | 445 (12.7)                | 0.65 (0.49, 0.87)                | 336 (11.3)                                | 347 (10.6)                        | 1.06 (0.82, 1.37)                                   |
| Macerated stillbirth         | 80 (3.5)                 | 112 (3.2)                 | 0.90 (0.55, 1.50)                | 132 (4.4)                                 | 144 (4.4)                         | 1.01 (0.65, 1.57)                                   |
| Male                         | 279 (23.7)               | 317 (17.4)                | 0.73 (0.57, 0.94)                | 252 (16.8)                                | 274 (15.8)                        | 1.07 (0.80, 1.42)                                   |
| Female                       | 240 (22.2)               | 237 (14.2)                | 0.64 (0.47, 0.86)                | 213 (14.9)                                | 216 (14.2)                        | 1.05 (0.80, 1.37)                                   |
| Birth attendant              |                          |                           |                                  |                                           |                                   |                                                     |
| All birth attendants         | 411 (21.7)               | 376 (13.6)                | 0.63 (0.49, 0.81)                | 359 (15.6)                                | 419 (15.4)                        | 1.01 (0.79, 1.30)                                   |
| Physician                    | 62 (15.3)                | 89 (16.8)                 | 1.10 (0.57, 2.11)                | 37 (19.8)                                 | 65 (15.9)                         | 1.25 (0.80, 1.95)                                   |
| Nurse/midwife                | 203 (27.7)               | 119 (13.9)                | 0.50 (0.35, 0.72)                | 175 (16.9)                                | 165 (16.9)                        | 1.00 (0.67, 1.48)                                   |
| Traditional birth attendants | 146 (19.4)               | 168 (12.2)                | 0.63 (0.45, 0.88)                | 147 (13.6)                                | 189 (14.2)                        | 0.96 (0.71, 1.30)                                   |
| Family/unattended/other      | 109 (29.3)               | 181 (24.4)                | 0.83 (0.57, 1.22)                | 109 (16.2)                                | 72 (13.2)                         | 1.23 (0.76, 2.01)                                   |
| Location of birth            |                          |                           |                                  |                                           |                                   |                                                     |

|                           |            |            |                     |            |            |                   |
|---------------------------|------------|------------|---------------------|------------|------------|-------------------|
| Home/birth attendant home | 392 (26.3) | 376 (16.4) | 0.63 (0.49, 0.80)   | 326 (16.2) | 326 (14.8) | 1.09 (0.86, 1.39) |
| Clinic                    | 32 (18.7)  | 67 (18.1)  | 0.97 (0.55, 1.70)   | 65 (12.4)  | 93 (16.7)  | 0.74 (0.41, 1.33) |
| Hospital                  | 96 (16.1)  | 114 (13.6) | 0.85 (0.49, 1.45)   | 77 (17.9)  | 72 (14.2)  | 1.26 (0.66, 2.39) |
| Birth weight (grams)*     |            |            |                     |            |            |                   |
| 1500-1999 grams           | 49 (106.3) | 89 (110.1) | 1.04 (0.63, 1.71)   | 63 (65.1)  | 45 (69.3)  | 0.94 (0.46, 1.90) |
| 2000-2499 grams           | 67 (30.2)  | 107 (29.1) | 0.96 (0.62, 1.50)   | 76 (19.9)  | 75 (18.3)  | 1.09 (0.59, 2.03) |
| ≥ 2500 grams              | 149 (9.1)  | 172 (5.9)  | 0.65 (0.43, 0.97) † | 162 (6.7)  | 144 (5.3)  | 1.28 (0.82, 2.00) |

ENC=Essential Newborn Care; NRP=Neonatal Resuscitation Program

\*May reflect missing values; birth weight available for 58.9% of stillbirths

Appendix Table 3: Perinatal Mortality Rates According to Characteristics of the Infant or Delivery \*

|                              | Pre-ENC<br>n (Rate/1000) | Post-ENC<br>n (Rate/1000) | RR (95% CI)<br>Post- vs. Pre-ENC | Post-NRP<br>Intervention<br>n (Rate/1000) | Post-NRP Control<br>n (Rate/1000) | RR (95% CI)<br>Intervention vs. Control |
|------------------------------|--------------------------|---------------------------|----------------------------------|-------------------------------------------|-----------------------------------|-----------------------------------------|
| Perinatal mortality          | 1,033 (45.9)             | 1,350 (38.9)              | 0.85 (0.70, 1.02)                | 1,011 (34.1)                              | 1,176 (36.1)                      | 0.94 (0.76, 1.17)                       |
| Male                         | 566 (48.2)               | 786 (43.4)                | 0.90 (0.74, 1.09)                | 549 (36.7)                                | 675 (38.9)                        | 0.94 (0.76, 1.17)                       |
| Female                       | 465 (43.4)               | 560 (33.8)                | 0.78 (0.63, 0.96)                | 459 (32.1)                                | 498 (32.8)                        | 0.98 (0.77, 1.24)                       |
| Birth attendant              |                          |                           |                                  |                                           |                                   |                                         |
| All birth attendants         | 802 (42.7)               | 907 (33.3)                | 0.78 (0.64, 0.94)                | 788 (34.4)                                | 966 (35.6)                        | 0.96 (0.77, 1.21)                       |
| Physician                    | 137 (34.3)               | 170 (33.1)                | 0.97 (0.62, 1.50)                | 61 (32.8)                                 | 148 (36.3)                        | 0.90 (0.62, 1.33)                       |
| Nurse/midwife                | 379 (51.9)               | 277 (32.8)                | 0.63 (0.48, 0.83)                | 421 (40.8)                                | 342 (35.1)                        | 1.16 (0.82, 1.65)                       |
| Traditional birth attendants | 286 (38.2)               | 460 (33.6)                | 0.88 (0.71, 1.10)                | 306 (28.5)                                | 476 (35.8)                        | 0.79 (0.61, 1.03)                       |
| Family/unattended/other      | 231 (62.6)               | 442 (59.6)                | 0.95 (0.72, 1.26)                | 222 (33.2)                                | 210 (38.6)                        | 0.86 (0.62, 1.19)                       |
| Location of birth            |                          |                           |                                  |                                           |                                   |                                         |
| Home/birth attendant home    | 766 (51.5)               | 957 (41.8)                | 0.81 (0.68, 0.97)                | 728 (36.2)                                | 824 (37.5)                        | 0.97 (0.77, 1.21)                       |
| Clinic                       | 71 (41.7)                | 167 (45.2)                | 1.08 (0.73, 1.60)                | 138 (26.4)                                | 175 (31.6)                        | 0.83 (0.52, 1.34)                       |

|                 |             |             |                   |             |             |                   |
|-----------------|-------------|-------------|-------------------|-------------|-------------|-------------------|
| Hospital        | 196 (33.2)  | 225 (27.7)  | 0.83 (0.55, 1.26) | 144 (33.6)  | 177 (35.0)  | 0.96 (0.56, 1.64) |
| Birth weight*   |             |             |                   |             |             |                   |
| 1500-1999 grams | 129 (283.8) | 227 (283.8) | 1.00 (0.74, 1.35) | 166 (171.7) | 160 (246.9) | 0.70 (0.45, 1.08) |
| 2000-2499 grams | 195 (88.2)  | 298 (81.3)  | 0.92 (0.69, 1.24) | 238 (62.5)  | 266 (64.9)  | 0.96 (0.72, 1.30) |
| ≥ 2500 grams    | 343 (21.0)  | 538 (18.5)  | 0.88 (0.67, 1.17) | 398 (16.5)  | 454 (16.6)  | 1.00 (0.76, 1.31) |

ENC=Essential Newborn Care; NRP=Neonatal Resuscitation Program

\*May reflect missing values; birth weight available for 74.7% of infants with perinatal mortality

Appendix Table 4: Mortality within 24 Hours of Birth\*

|                              | Pre-ENC       | Post-ENC      | RR (95% CI)       | Post-NRP<br>Intervention | Post-NRP Control | RR (95% CI)       |
|------------------------------|---------------|---------------|-------------------|--------------------------|------------------|-------------------|
|                              | n (Rate/1000) | n (Rate/1000) | Post- vs. Pre-ENC | n (Rate/1000)            | n (Rate/1000)    |                   |
| 24 hour neonatal mortality   | 196 (8.9)     | 340 (9.9)     | 1.11 (0.74, 1.68) | 152 (5.2)                | 203 (6.3)        | 0.82 (0.52, 1.30) |
| Male                         | 100 (8.7)     | 194 (10.8)    | 1.24 (0.78, 1.99) | 92 (6.2)                 | 123 (7.2)        | 0.87 (0.52, 1.45) |
| Female                       | 95 (9.0)      | 145 (8.8)     | 0.98 (0.65, 1.47) | 60 (4.3)                 | 78 (5.2)         | 0.82 (0.52, 1.28) |
| Birth attendant              |               |               |                   |                          |                  |                   |
| All birth attendants         | 156 (8.4)     | 276 (10.2)    | 1.20 (0.77, 1.88) | 123 (5.4)                | 158 (5.9)        | 0.92 (0.57, 1.50) |
| Physician                    | 23 (5.8)      | 32 (6.1)      | 1.07 (0.56, 2.04) | 7 (3.8)                  | 24 (6.0)         | 0.64 (0.13, 3.15) |
| Nurse/midwife                | 55 (7.7)      | 90 (10.7)     | 1.39 (0.71, 2.69) | 58 (5.7)                 | 38 (4.0)         | 1.44 (0.52, 3.95) |
| Traditional birth attendants | 78 (10.6)     | 154 (11.4)    | 1.07 (0.69, 1.68) | 58 (5.5)                 | 96 (7.3)         | 0.75 (0.44, 1.27) |
| Family/unattended/other      | 40 (11.1)     | 63 (8.7)      | 0.78 (0.29, 2.11) | 28 (4.2)                 | 45 (8.3)         | 0.51 (0.23, 1.11) |
| Location of birth            |               |               |                   |                          |                  |                   |
| Home/birth attendant home    | 133 (9.1)     | 217 (9.6)     | 1.05 (0.68, 1.64) | 79 (4.0)                 | 144 (6.6)        | 0.60 (0.36, 1.01) |
| Clinic                       | 24 (14.3)     | 78 (21.4)     | 1.50 (0.83, 2.73) | 43 (8.3)                 | 38 (7.0)         | 1.19 (0.52, 2.71) |

|                 |           |           |                   |           |           |                   |
|-----------------|-----------|-----------|-------------------|-----------|-----------|-------------------|
| Hospital        | 39 (6.6)  | 44 (5.3)  | 0.80 (0.44, 1.46) | 29 (6.9)  | 21 (4.2)  | 1.63 (0.53, 5.05) |
| Birth weight    |           |           |                   |           |           |                   |
| 1500-1999 grams | 34 (82.5) | 64 (89.0) | 1.08 (0.53, 2.19) | 27 (29.8) | 27 (44.7) | 0.67 (0.22, 2.04) |
| 2000-2199 grams | 41 (19.1) | 68 (19.0) | 1.00 (0.54, 1.83) | 32 (8.6)  | 34 (8.4)  | 1.02 (0.46, 2.25) |
| ≥ 2500 grams    | 81 (5.0)  | 171 (5.9) | 1.18 (0.66, 2.11) | 67 (2.8)  | 81 (3.0)  | 0.94 (0.47, 1.87) |

ENC=Essential Newborn Care; NRP=Neonatal Resuscitation Program

\*May reflect missing values
